# Supplementary material for: Large-scale synthesis of CexLa1−xF3 nanocomposite scintillator materials
Source: Royal Society of Chemistry journal article supplement (doi:10.1039/c0jm04162a), 2011-01-01
Supplement: c0jm04162a.pdf [file c0jm04162a.pdf]

**Supporting Information**

**Large-scale synthesis of  $\text{Ce}_x\text{La}_{1-x}\text{F}_3$   
nanocomposite scintillator materials**

*Russell K. Feller,<sup>1</sup> Geraldine M. Purdy,<sup>1</sup> Denisse Ortiz-Acosta,<sup>1</sup> Sy Stange,<sup>2</sup> Andy Li,<sup>2</sup>  
Edward A. McKigney,<sup>2</sup> Ernst I. Esch,<sup>2</sup> Ross E. Muenchausen,<sup>3</sup> Robert Gilbertson,<sup>4</sup>  
Minesh Bacrania,<sup>2</sup> Bryan L. Bennett,<sup>3</sup> Kevin C. Ott,<sup>1</sup> Leif Brown,<sup>5</sup> Clay S. Macomber,<sup>1</sup>  
Brian L. Scott,<sup>1</sup> Rico E. Del Sesto<sup>1\*</sup>*

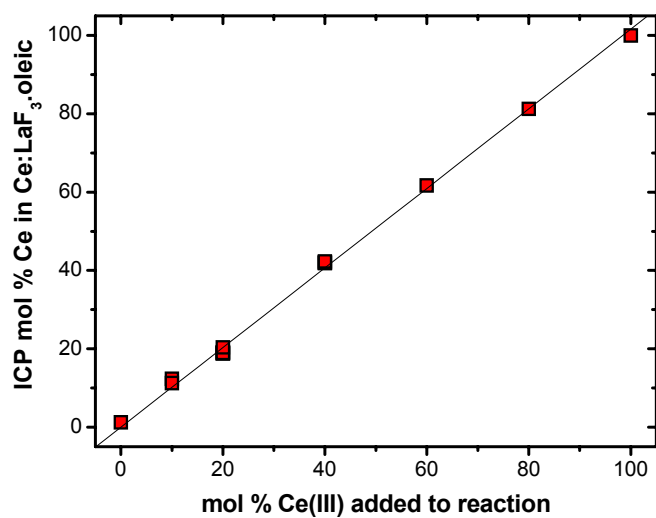

**Figure S1.** Percent of Ce(III) doping in nanocomposites (mol %) as a function of percent Ce(III) precursors in the original reaction mixture.

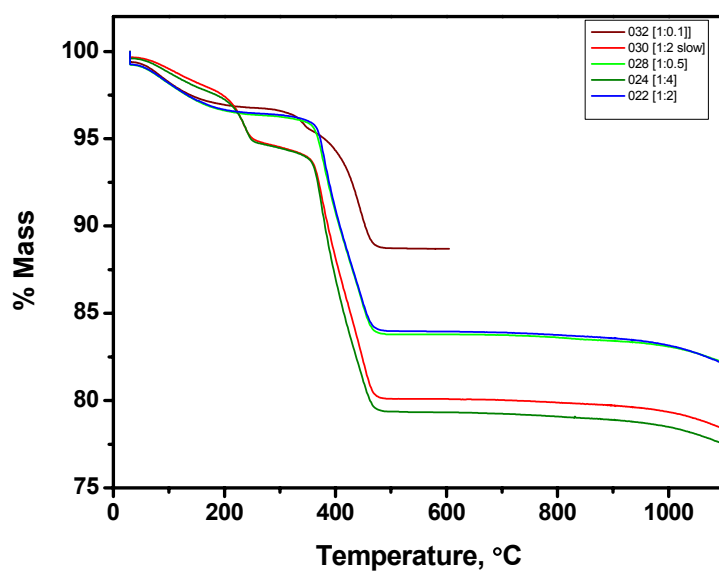

**Figure S2.** TGA traces for several Ce<sub>x</sub>La<sub>1-x</sub>F<sub>3</sub>·OA nanocomposites.

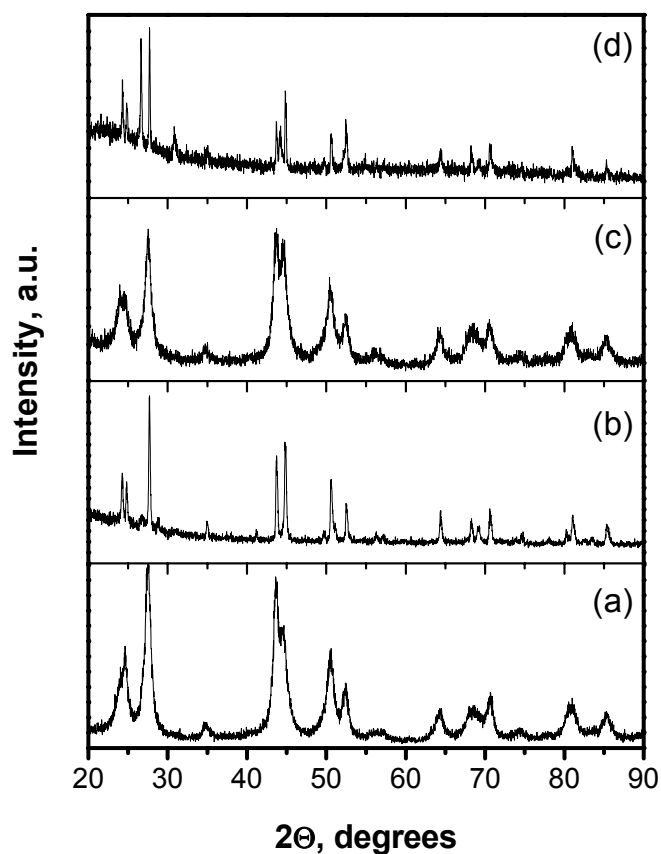

**Figure S3.** Powder XRD patterns for nanocomposites  $\text{Ce}_{0.19}\text{La}_{0.81}\text{F}_3 \cdot 0.05 \text{ OA}$  (hard, white powder) as-prepared (a) and heated to  $600^\circ\text{C}$  (b), and transparent gel  $\text{Ce}_{0.19}\text{La}_{0.81}\text{F}_3 \cdot 0.24 \text{ OA}$  as-prepared (c) and heated to  $1100^\circ\text{C}$  (d). (b) indicates a highly pure, crystalline trigonal  $\text{CeF}_3$ , while (d) also shows impurities both of  $\text{Ce}_2\text{O}_3$  and of what is suspected to be tetragonal  $\text{CeF}_3$ .

**Table S1.** Composition of representative samples of the  $Ce_xLa_{1-x}F_3 \cdot OA$  nanocomposites.

| Sample | Ce(III)<br>ICP<br>mol % <sup>a</sup> | La(III)<br>ICP<br>mol % <sup>a</sup> | Oleic Acid<br>ICP<br>Equiv. <sup>a</sup> | $Ce_xLa_{1-x}F_3$<br>in comp,<br>Mol % | $Ce_xLa_{1-x}F_3$<br>in comp,<br>vol % | Density<br>of comp,<br>g/cm <sup>3</sup> | Nanocomposite<br>Formula                                          |
|--------|--------------------------------------|--------------------------------------|------------------------------------------|----------------------------------------|----------------------------------------|------------------------------------------|-------------------------------------------------------------------|
| A      | 0.0                                  | 100.0                                | 0.34                                     | 67%                                    | 24%                                    | 2.07                                     | LaF <sub>3</sub> ·0.35(oleic)                                     |
| B      | 10.7                                 | 89.2                                 | 0.31                                     | 69%                                    | 26%                                    | 2.15                                     | Ce <sub>0.11</sub> La <sub>0.89</sub> F <sub>3</sub> ·0.31(oleic) |
| C      | 12.3                                 | 87.6                                 | 0.14                                     | 83%                                    | 44%                                    | 3.05                                     | Ce <sub>0.12</sub> La <sub>0.88</sub> F <sub>3</sub> ·0.14(oleic) |
| D      | 18.9                                 | 81.0                                 | 0.06                                     | 92%                                    | 64% <sup>b</sup>                       | 4.07                                     | Ce <sub>0.19</sub> La <sub>0.81</sub> F <sub>3</sub> ·0.05(oleic) |
| E      | 19.1                                 | 80.8                                 | 0.09                                     | 88%                                    | 53%                                    | 3.53                                     | Ce <sub>0.19</sub> La <sub>0.81</sub> F <sub>3</sub> ·0.09(oleic) |
| F      | 20.3                                 | 79.6                                 | 0.22                                     | 76%                                    | 33%                                    | 2.51                                     | Ce <sub>0.20</sub> La <sub>0.80</sub> F <sub>3</sub> ·0.22(oleic) |
| G      | 19.1                                 | 80.8                                 | 0.24                                     | 74%                                    | 31%                                    | 2.41 <sup>c</sup>                        | Ce <sub>0.19</sub> La <sub>0.81</sub> F <sub>3</sub> ·0.24(oleic) |
| H      | 18.7                                 | 81.2                                 | 0.21                                     | 77%                                    | 34%                                    | 2.56                                     | Ce <sub>0.19</sub> La <sub>0.81</sub> F <sub>3</sub> ·0.21(oleic) |
| I      | 42.0                                 | 57.9                                 | 0.07                                     | 90%                                    | 59% <sup>d</sup>                       | 3.80                                     | Ce <sub>0.42</sub> La <sub>0.58</sub> F <sub>3</sub> ·0.07(oleic) |
| J      | 41.8                                 | 58.1                                 | 0.18                                     | 80%                                    | 38%                                    | 2.74                                     | Ce <sub>0.42</sub> La <sub>0.58</sub> F <sub>3</sub> ·0.18(oleic) |
| K      | 61.6                                 | 38.3                                 | 0.28                                     | 71%                                    | 28%                                    | 2.25                                     | Ce <sub>0.62</sub> La <sub>0.38</sub> F <sub>3</sub> ·0.28(oleic) |
| L      | 81.2                                 | 18.7                                 | 0.16                                     | 82%                                    | 41%                                    | 2.88                                     | Ce <sub>0.81</sub> La <sub>0.19</sub> F <sub>3</sub> ·0.16(oleic) |
| M      | 100.0                                | 0.0                                  | 0.13                                     | 84%                                    | 45%                                    | 3.08                                     | CeF <sub>3</sub> ·0.13(oleic)                                     |

- a) Determined by ICP measurements of nanocomposite digested in 5% HNO<sub>3</sub>. b) Sample is an opaque powder. c) Density as measured by water displacement is 2.44 g/cc. d) Sample is a transparent wax at 1 cm thick.
